# Supplementary material for: Multi-center Real-World Analysis of Breast-Conserving Surgery versus Mastectomy for Early-Stage Breast Cancer in China (the decade 2013-2022)
Source: Research Square preprint supplement (doi:10.21203/rs.3.rs-6898820/v1), 2025-07-01
Supplement: Supplementary file 1 [file 4f7a6c73a5dd85fc36695405.docx]

# Supplementary materials

**
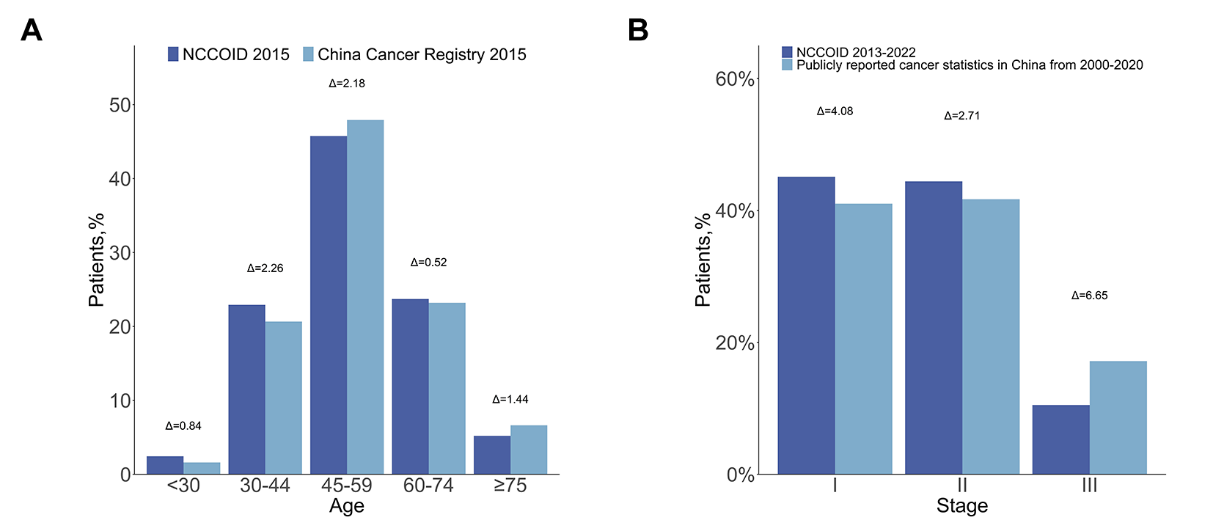
**

**Supplementary** **Figure 1. Comparison of age and stage distributions between NCCOID and public data in China cancer registry**

(A) Comparison of age distribution between NCCOID in 2015 and statistics from the Chinese cancer registry in 2015 Δ indicates the absolute difference between proportions in NCCOID 2015 and statistics from the Chinese cancer registry in 20151. NCCOID, National Cancer Center Oncology Information Database. (B) Comparison of clinical stage distribution between NCCOID from 2013-2022 and publicly reported cancer statistics from China in 2000-2020 Δ indicates the absolute difference in each clinical stage between proportions in NCCOID from 2013-2022 and publicly reported cancer statistics from China in 2000-20202, NCCOID, National Cancer Center Oncology Information Database.


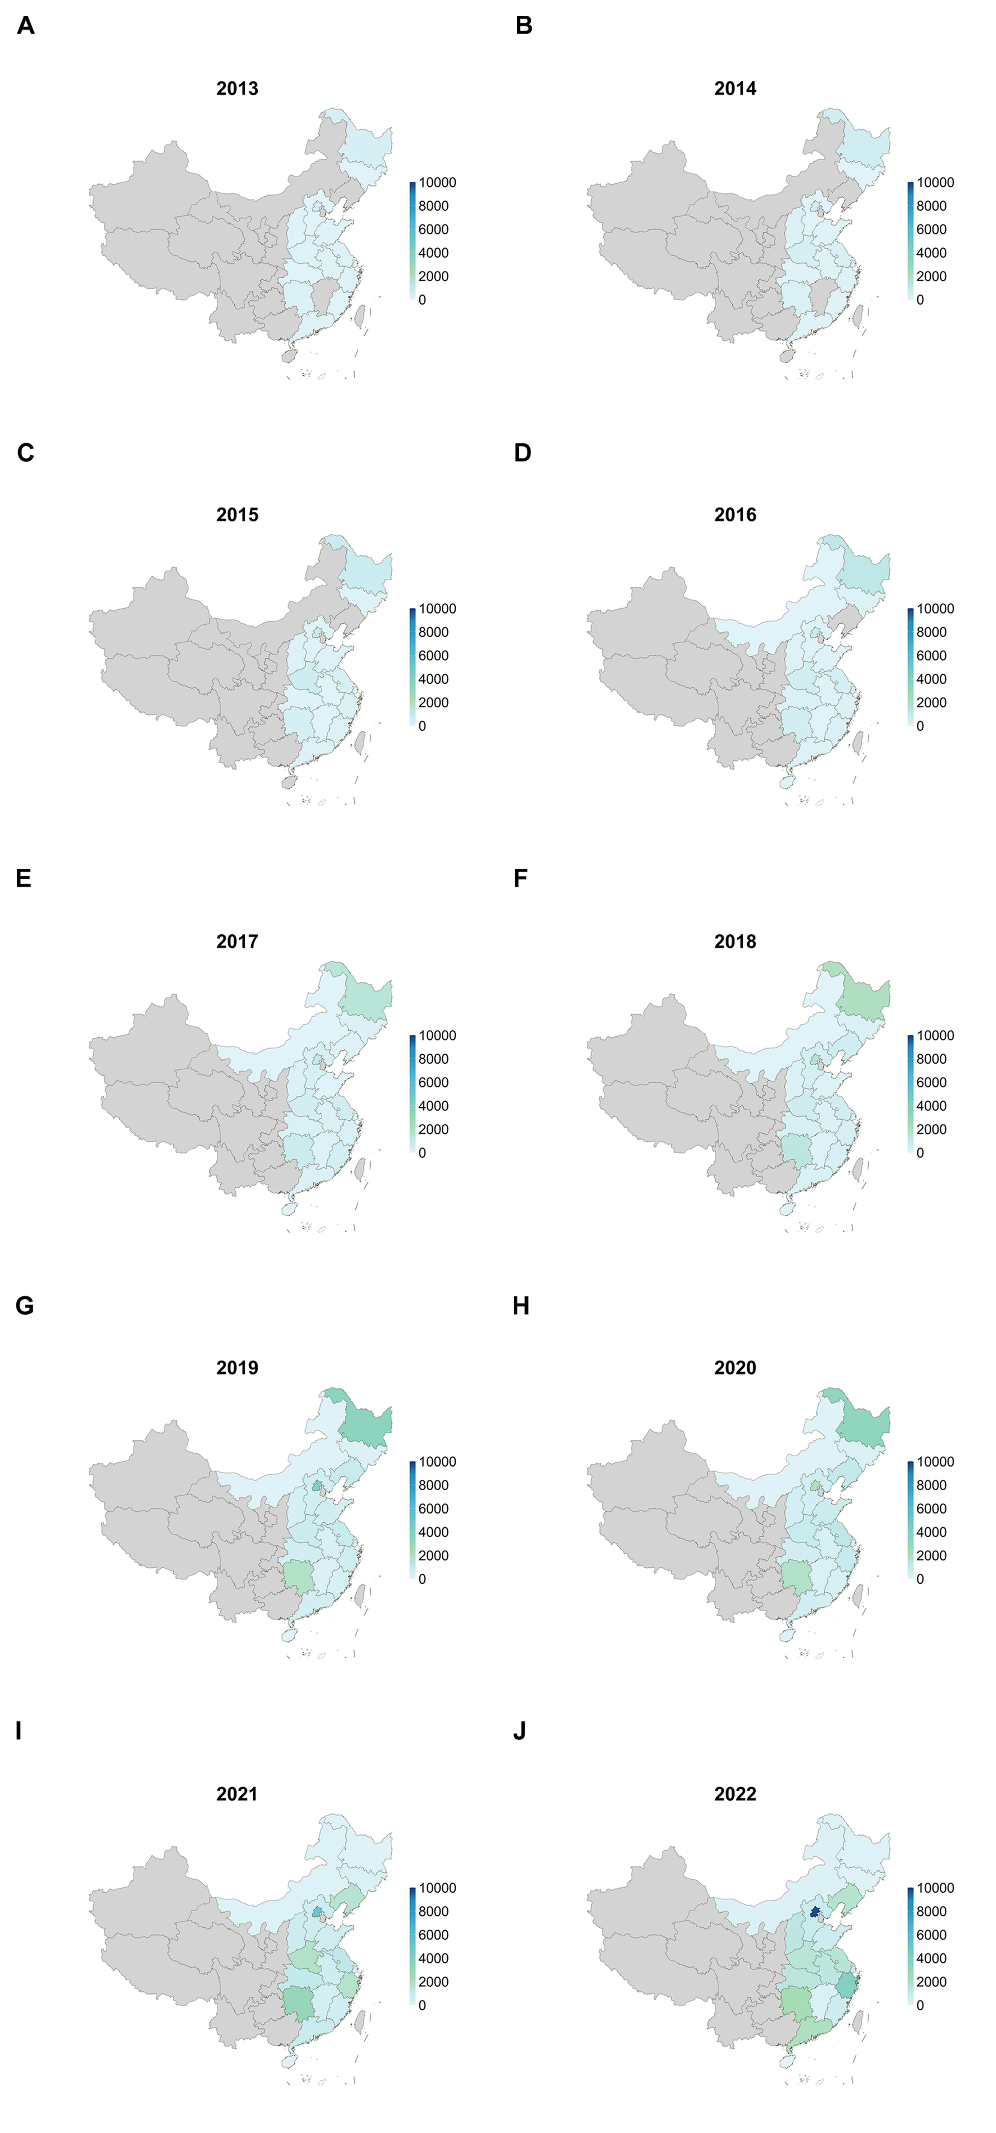


**Supplementary** **Figure2 Enrolled participants across regions from 2013 to 2022** (A) ~ (J): Number of participants of different regions from 2013 to 2022 respectively. Regions covered with grey indicate no inclusion.


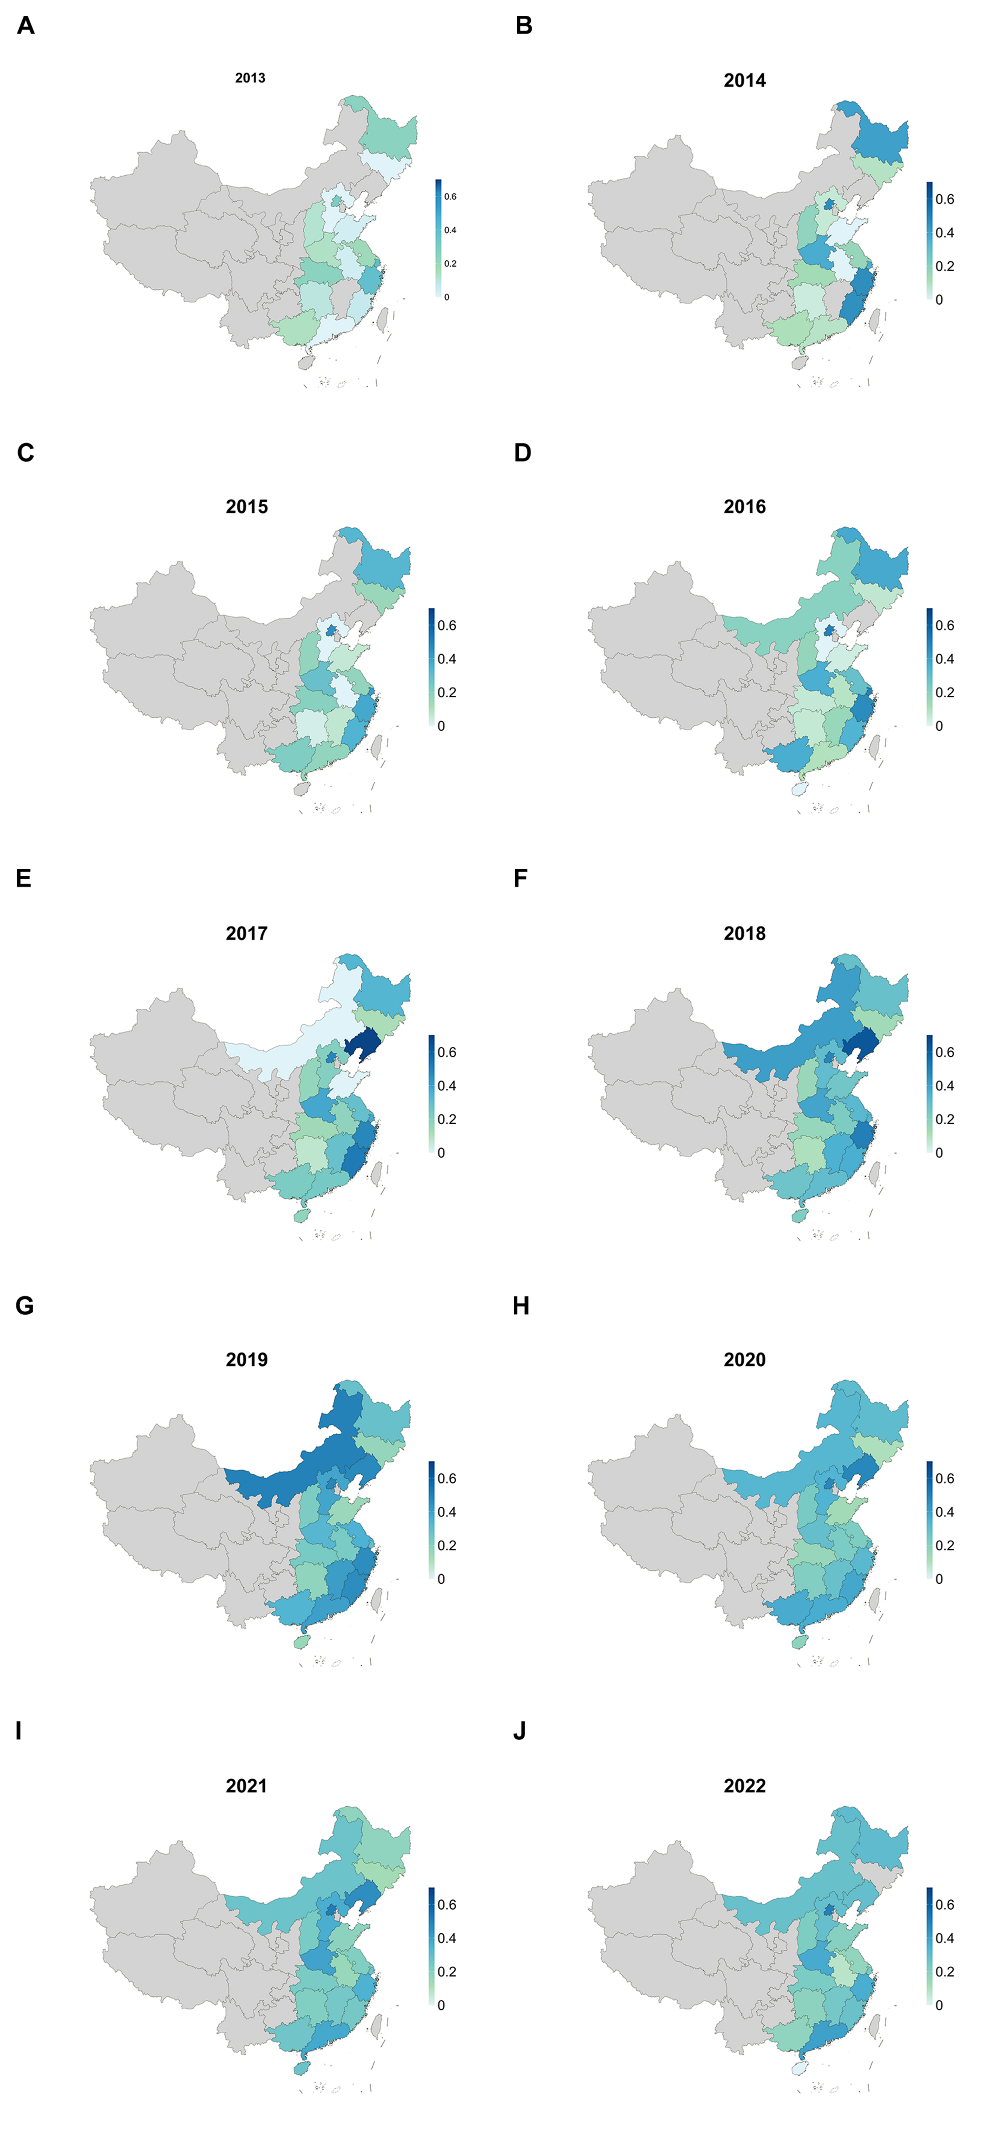


**Supplementary** **Figure 3. The ratio of BCS across regions from 2013 to 2022** (A) ~ (J): Ratio of BCS among the study population of different regions from 2013 to 2022 respectively. Regions covered with grey indicate no inclusion.

**
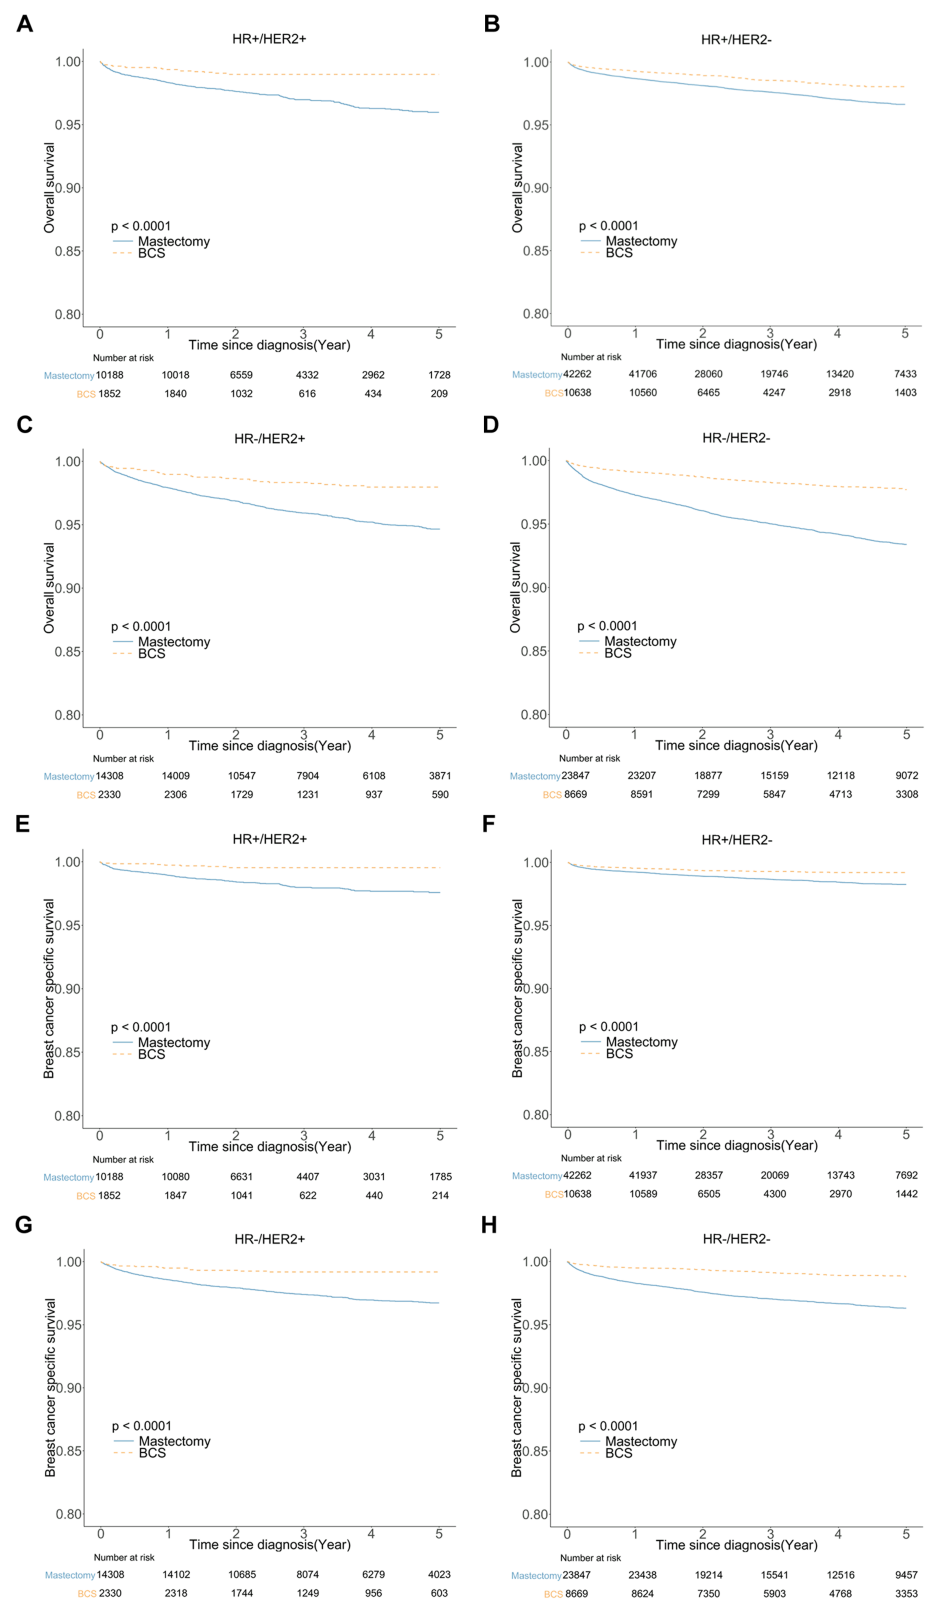
**

**Supplementary** **Figure 4. 5-year overall survival and breast cancer-specific survival of patients stratified by molecular subtype.**

Comparison of BCS vs. mastectomy group of 5-year overall survival in patients with (A) HR+/HER2+, (B) HR+/HER2-, (C) HR-/HER2+ and (D) HR-/HER2-; Comparison of BCS vs. mastectomy group of 5-year breast cancer-specific survival in patients with (E) HR+/HER2+, (F) HR+/HER2-, (G) HR-/HER2+ and (H) HR-/HER2-. BCS, breast-conserving surgery.


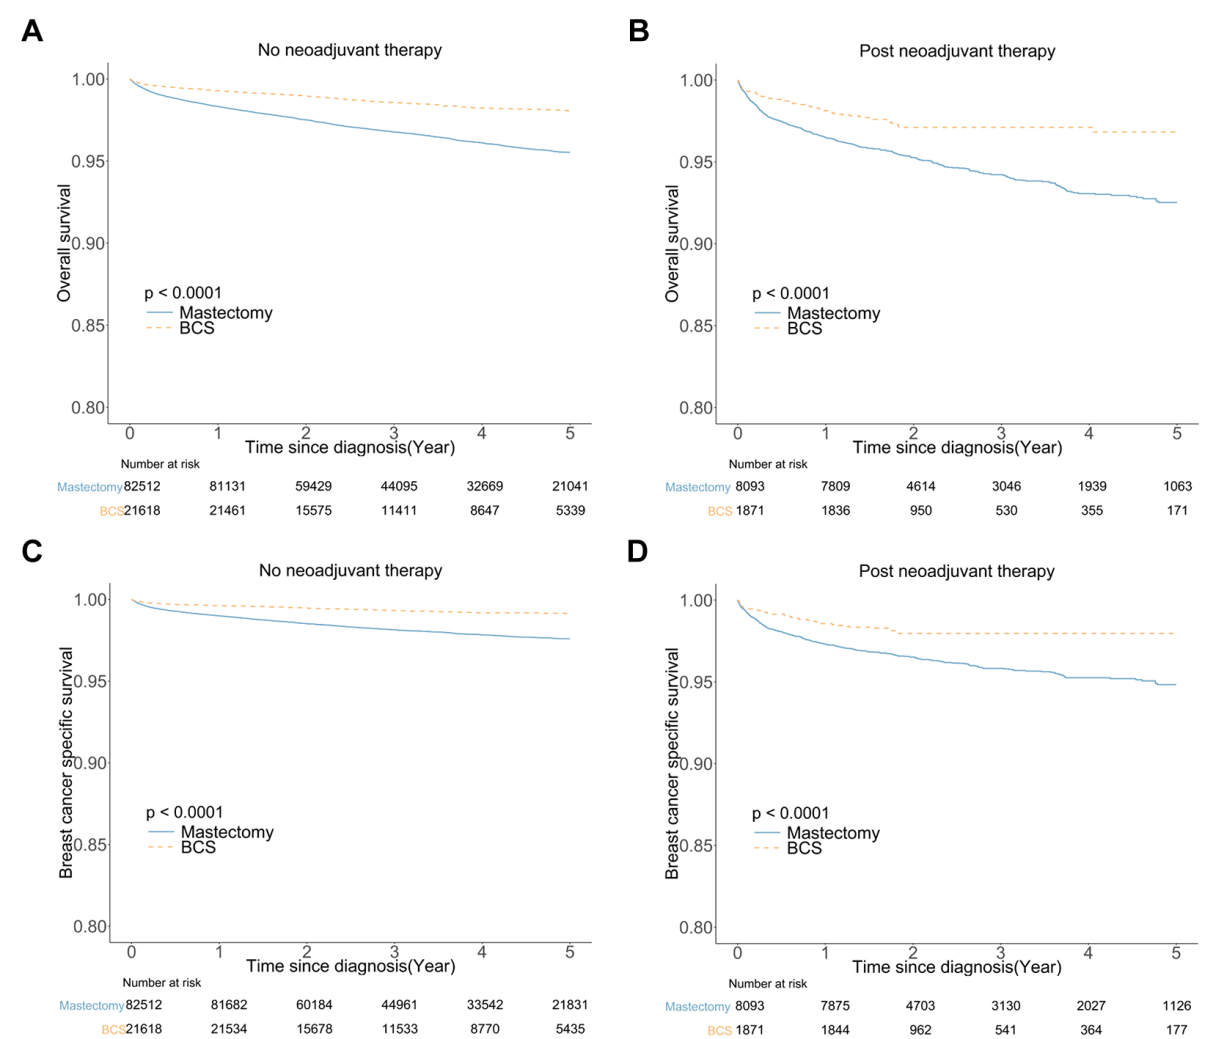
**Supplementary** **Figure 5. 5-year overall survival and breast cancer-specific survival of patients with/without neoadjuvant therapy.**

Comparison of BCS vs. mastectomy group of 5-year overall survival and breast cancer-specific survival in patients who (A), (B) did not perform neoadjuvant therapy; (C), (D) conducted neoadjuvant therapy. BCS, breast-conserving surgery.

**Supplementary Table 1. 5-year overall survival and breast cancer-specific survival**

| Characteristic | | n | OS | | | | |  | BCSS | | | | |
| --- | --- | --- | --- | --- | --- | --- | --- | --- | --- | --- | --- | --- | --- |
|  |  | 5-year OS | HR (95% CI) | P Value | HR (95% CI) | P Value |  | 5-year BCSS | HR(95% CI) | P Value | HR (95% CI) | P Value |
|  |  |  |  | Unadjusted | | Adjusted | |  |  | Unadjusted | | Adjusted | |
| T |  |  |  |  |  |  |  |  |  |  |  |  |  |
| IS | MT | 12076 | 95.7% | 1 |  |  |  |  | 98.0% | 1 |  | 1 |  |
|  | BCS | 5018 | 97.9% | 0.52(0.41-0.66) | <0.001 | 0.68(0.54-0.86) a | 0.00119 |  | 99.2% | 0.44(0.30-0.62) | <0.001 | 0.51(0.36-0.74) | <0.001 |
| 1 | MT | 30217 | 97.1% | 1 |  | 1 |  |  | 98.8% | 1 |  | 1 |  |
|  | BCS | 11437 | 98.7% | 0.39(0.31-0.49) | <0.001 | 0.61(0.49-0.77) | <0.001 |  | 99.4% | 0.38(0.27-0.52) | <0.001 | 0.75(0.5-1.05) | 0.091 |
| 2 | MT | 43897 | 95.7% | 1 |  | 1 |  |  |  | 1 |  | 1 |  |
|  | BCS | 6661 | 97.1% | 0.68(0.57-0.81) | <0.001 | 1.04(0.87-1.23) | 0.681 |  |  | 0.58(0.46-0.73) | <0.001 | 0.89(0.70-1.13) | 0.329 |
| 3 | MT | 2820 | 82.7% | 1 |  | 1 |  |  | 88.3% | 1 |  | 1 |  |
|  | BCS | 294 | 93.1% | 0.42(0.26-0.66) | <0.001 | 0.68(0.42-1.08) | 0.099 |  | 94.2% | 0.52(0.31-0.86) | 0.010 | 0.83(0.50-1.39) | 0.483 |
| 4 | MT | 1595 | 72.7% | 1 |  | 1 |  |  | 81.2% | 1 |  | 1 |  |
|  | BCS | 79 | 71.4% | 1.39(0.91-2.14) | 0.131 | 1.56(1.01-2.41) | 0.045 |  | 77.8% | 1.47(0.90-2.41) | 0.121 | 1.69(1.03-2.79) | 0.038 |
| N |  |  |  |  |  |  |  |  |  |  |  |  |  |
| 0 | MT | 61631 | 97.2% | 1 |  | 1 |  |  | 98.8% | 1 |  | 1 |  |
|  | BCS | 20690 | 98.5% | 0.54(0.47-0.62) | <0.001 | 0.67(0.58-0.78) b | <0.001 |  | 99.3% | 0.59(0.48-0.73) | <0.001 | 0.77(0.62-0.95) | 0.014 |
| 1 | MT | 18902 | 95.2% | 1 |  | 1 |  |  | 97.4% | 1 |  | 1 |  |
|  | BCS | 2270 | 96.1% | 0.84(0.65-1.07) | 0.159 | 1.09(0.85-1.39) | 0.514 |  | 98.2% | 0.68(0.48-0.98) | 0.037 | 0.87(0.61-1.25) | 0.464 |
| 2 | MT | 6700 | 88.0% |  |  | 1 |  |  | 92.4% | 1 |  | 1 |  |
|  | BCS | 346 | 88.9% | 1.05(0.74-1.48) | 0.798 | 1.22(0.86-1.73) | 0.259 |  | 94.2% | 0.83(0.52-1.32) | 0.432 | 0.93(0.58-1.49) | 0.747 |
| 3 | MT | 3372 | 74.1% |  |  | 1 |  |  | 80.6% | 1 |  | 1 |  |
|  | BCS | 183 | 75.1% | 1.03(0.75-1.41) | 0.842 | 1.11(0.81-1.53) | 0.507 |  | 86.4% | 0.78(0.52-1.18) | 0.238 | 0.80(0.53-1.20) | 0.280 |

a For subgroups stratified by T stage, HR corrected for age, year at diagnosis, N stage, molecular subtype, and performance of neoadjuvant therapy.

b For subgroups stratified by N stage, HR corrected for age, year at diagnosis, T stage, molecular subtype, and performance of neoadjuvant therapy.

OS, overall survival; BCSS, breast cancer-specific survival; HR, hazard ratio; CI, confidence interval; MT, mastectomy; BCS, breast-conserving surgery; AJCC, American Joint Committee on Cancer.

**Supplementary Table 2. 5-year death rate of patients who died of breast cancer and cardiovascular disease.**

| Cause of death | 5-year death rate, % | | *P* value |
| --- | --- | --- | --- |
| Mastectomy | Breast conserving surgery |  |
| Breast cancer | 2.7 | 1.0 | < 0.001 |
| Cardiovascular disease | 0.6 | 0.3 |

**Supplementary** **Table 3. Comparison of the median total cost of patients diagnosed with stage 0, I, II, and III disease between mastectomy and breast-conserving surgery group.**

|  | Median total cost (range), RMB | | *P* value |
| --- | --- | --- | --- |
| Stage | Mastectomy | Breast conserving surgery |  |
| 0 | 32161.89(22177.79-59440.47) | 44410.04(24593.12-93040.49) | < 0.001 |
| I | 47770.97(29024.81-85141.18) | 72960.00(36742.50-117120.98) |
| II | 55694.12(31593.93-98457.27) | 61345.50(31764.50-113457.96) |
| III | 74425.43(37262.04-125705.55) | 85559.54(35933.29-129317.37) |

**Reference**

1. Chen W, Zheng R, Baade PD, et al. Cancer statistics in China, 2015. *CA Cancer J Clin*. Mar-Apr 2016;66(2):115-32. doi:10.3322/caac.21338

2. Benitez Fuentes JD, Morgan E, de Luna Aguilar A, et al. Global Stage Distribution of Breast Cancer at Diagnosis: A Systematic Review and Meta-Analysis. *JAMA Oncol*. Jan 1 2024;10(1):71-78. doi:10.1001/jamaoncol.2023.4837
